# Supplementary material
Source: publisher figshare collection journal article supplement (https://acs.figshare.com/ndownloader/files/4842253)

## Supporting Information

Biflorin, isolated from the flower buds of *Syzygium aromaticum* L., suppresses LPS-induced inflammatory mediators via STAT1 inactivation in macrophages and protects mice from endotoxin shock

Figure S1. Scheme of the extraction protocols

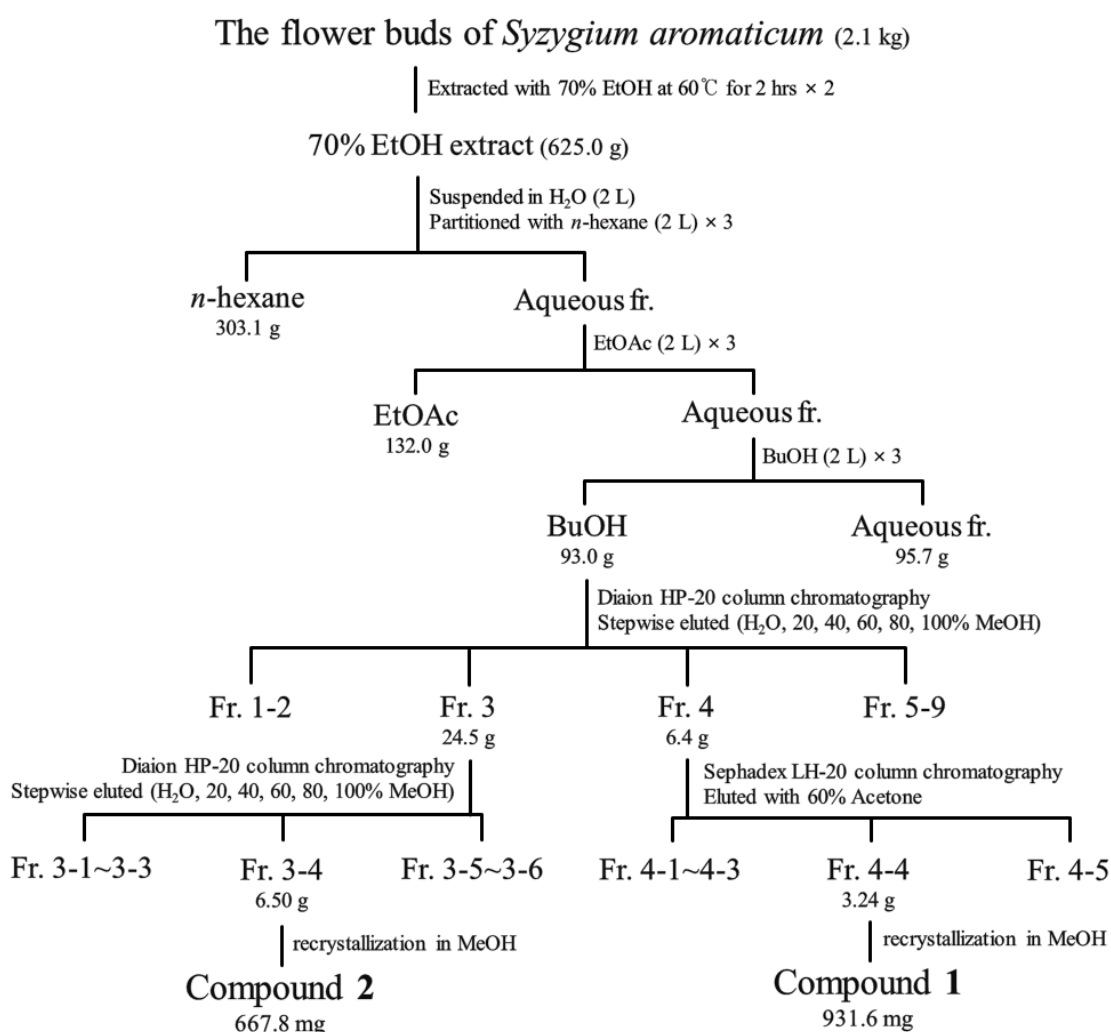

Supplement: Supplementary file 1 [file 4842253]
